# Supplementary material for: Preparation of double-layered nanosheets containing pH-responsive polymer networks in the interlayers and their conversion into single-layered nanosheets through the cleavage of cross-linking points
Source: Royal Society of Chemistry journal article supplement (doi:10.1039/d1dt04355b), 2022-01-01
Supplement: d1dt04355b1.pdf [file d1dt04355b1.pdf]

## An Electronic Supplementary Information (ESI)

# Preparation of double-layered nanosheets containing pH-responsive polymer networks in the interlayers and their conversion into single-layered nanosheets through cleavage of cross-linking points

Takuma Kamibe<sup>a</sup>, Régis Guégan<sup>b</sup>, Masashi Kunitake<sup>c</sup>, Takehiko Tsukahara<sup>d</sup>,

Naokazu Idota<sup>\*d,e</sup> and Yoshiyuki Sugahara<sup>\*a,e</sup>

<sup>a</sup> Department of Applied Chemistry, School of Advanced Science and Engineering, Waseda University, 3-4-1 Okubo, Shinjuku-ku, Tokyo 169-8555

<sup>b</sup> Global Center for Science and Engineering, Waseda University, 3-4-1 Okubo, Shinjuku-ku, Tokyo 169-8555, Japan

<sup>c</sup> Institute of Industrial Nanomaterials, Kumamoto University, 2-39-1, Kurokami, Chuo-ku, Kumamoto 860-8555, Japan

<sup>d</sup> Laboratory for Zero-Carbon Energy, Institute of Innovative Research, Tokyo Institute of Technology, 2-12-1-N1-6, Ookayama, Meguro-ku, Tokyo 152-8550, Japan

<sup>e</sup> Kagami Memorial Research Institute for Materials Science and Technology, Waseda University, 2-8-26 Nishiwaseda, Shinjuku-ku, Tokyo 169-0051, Japan

**\*Corresponding Authors: [idota.n.aa@m.titech.ac.jp](mailto:idota.n.aa@m.titech.ac.jp), [ys6546@waseda.jp](mailto:ys6546@waseda.jp)**

### Contents

|                                                                                                                                                                                                                                                             |   |
|-------------------------------------------------------------------------------------------------------------------------------------------------------------------------------------------------------------------------------------------------------------|---|
| <b>Fig. S1</b> Schematic image of grafting reaction of hexaniobate with MEP and CPMP. ....                                                                                                                                                                  | 2 |
| <b>Fig. S2</b> XRD patterns of (a) $K_4Nb_6O_{17} \cdot 3H_2O$ , (b) MEP_NbO, (c) $2C_{18}MeN\_NbO$ , (d) CPMP_NbO, (e) PNB_NbO with $FeK\alpha$ radiation and (f) PNB_NbO with $CuK\alpha$ radiation. ....                                                 | 2 |
| <b>Fig. S3</b> Solid-state $^{31}P$ NMR spectra of (a) MEP_NbO and (b) CPMP_NbO. ....                                                                                                                                                                       | 3 |
| <b>Fig. S4</b> TG curves of CPMP_NbO and PNB_NbO. ....                                                                                                                                                                                                      | 3 |
| <b>Fig. S5</b> The expected hydrolysis of TBA_PNB@pH4_NbO. ....                                                                                                                                                                                             | 4 |
| <b>Fig. S6</b> Photographs of colloidal dispersions with Tyndall scattering of (a) PNB@pH4_NbO, (b) TBA_PNB_NbO and (c) TBA_PNB@pH4_NbO, and TEM images and electron diffraction patterns of (d) PNB@pH4_NbO, (e) TBA_PNB_NbO and (f) TBA_PNB@pH4_NbO. .... | 5 |
| <b>Fig. S7</b> The enlarged cross-section profiles of (a) PNB@pH4_NbO, (b) TBA_PNB_NbO and (c) TBA_PNB@pH4_NbO in Fig. 7 (a), Fig. 8 (a) and (c), respectively. ....                                                                                        | 6 |

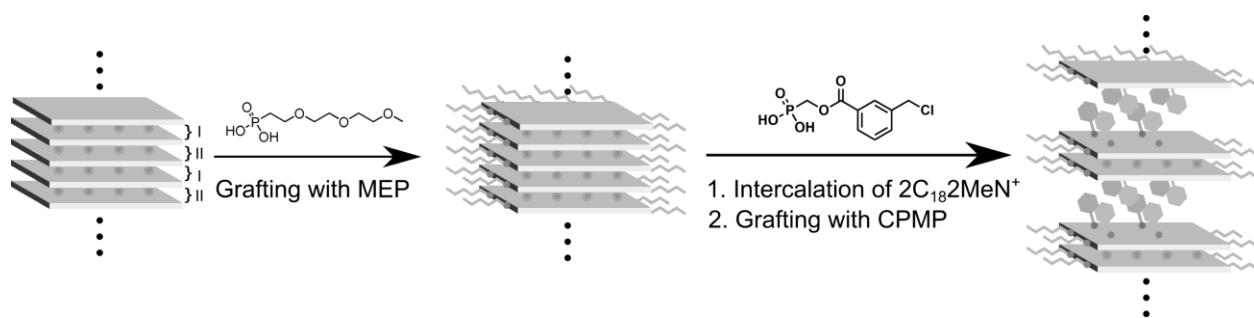

**Fig. S1** Schematic image of grafting reaction of hexaniobate with MEP and CPMP.

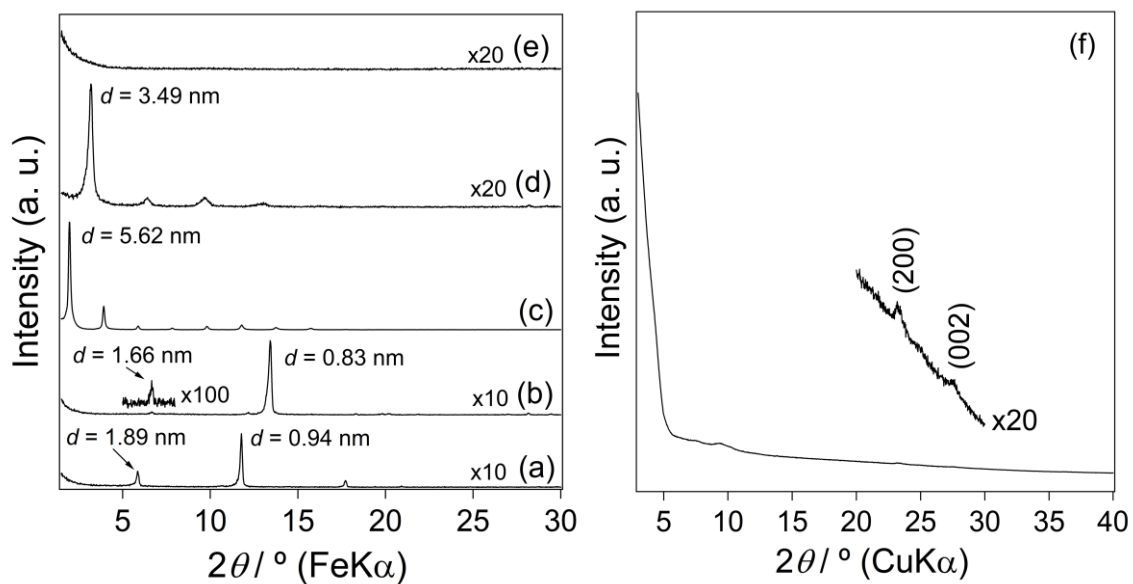

**Fig. S2** XRD patterns of (a)  $\text{K}_4\text{Nb}_6\text{O}_{17} \cdot 3\text{H}_2\text{O}$ , (b) MEP\_NbO, (c)  $2\text{C}_{18}2\text{MeN}_\text{NbO}$ , (d) CPMP\_NbO, (e) PNB\_NbO with FeK $\alpha$  radiation and (f) PNB\_NbO with CuK $\alpha$  radiation.

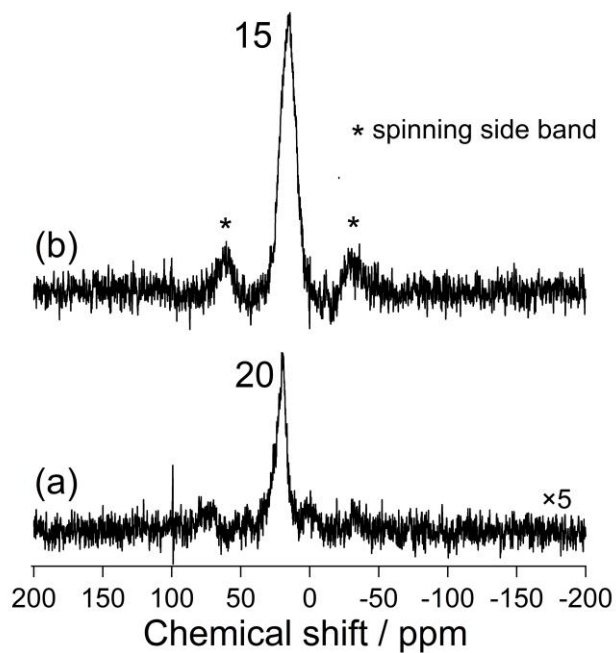

**Fig. S3** Solid-state  $^{31}\text{P}$  NMR spectra of (a) MEP\_NbO and (b) CPMP\_NbO.

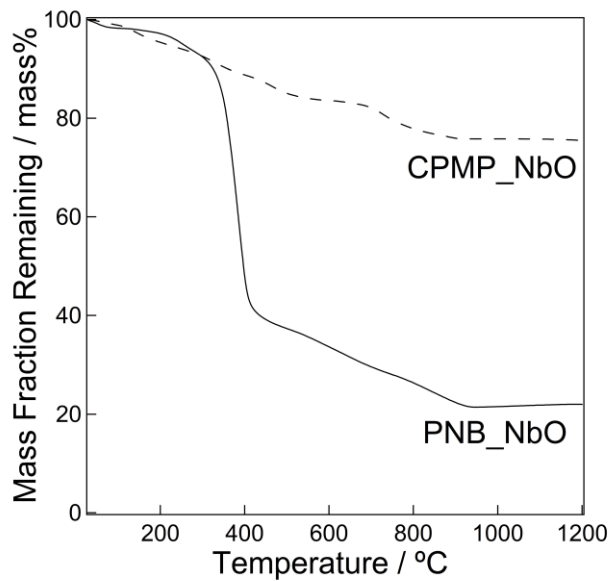

**Fig. S4** TG curves of CPMP\_NbO and PNB\_NbO.

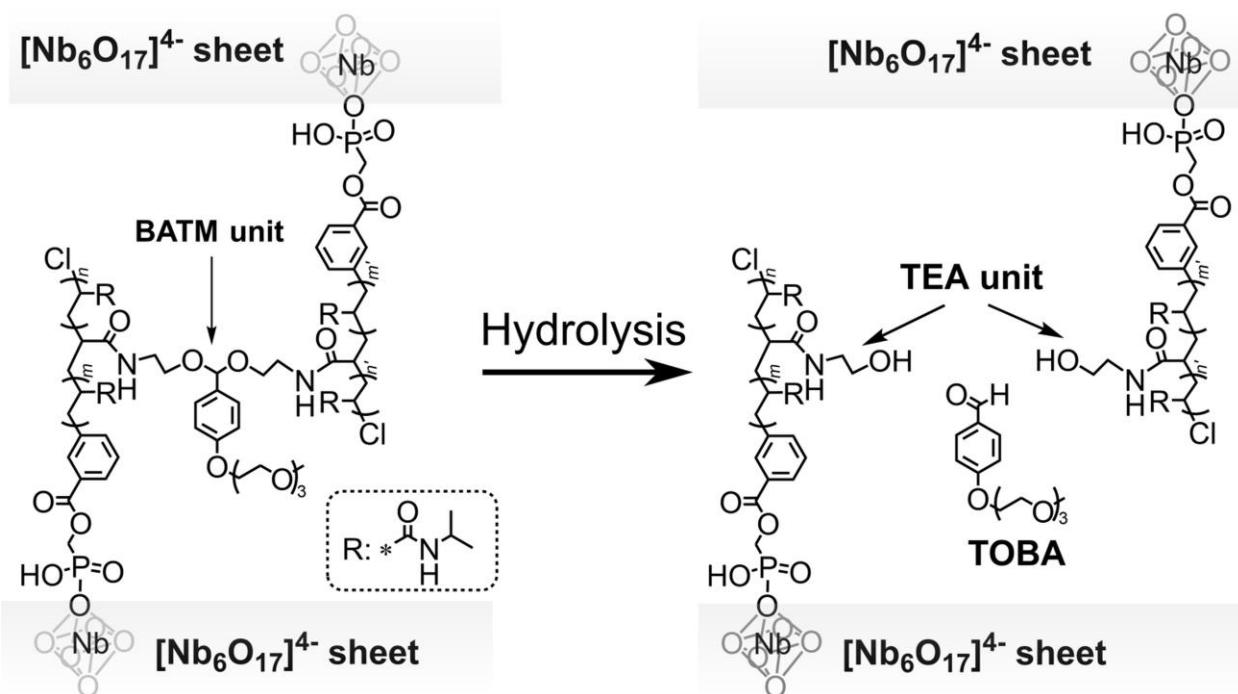

Fig. S5 The expected hydrolysis of TBA\_PNB@pH4\_NbO.

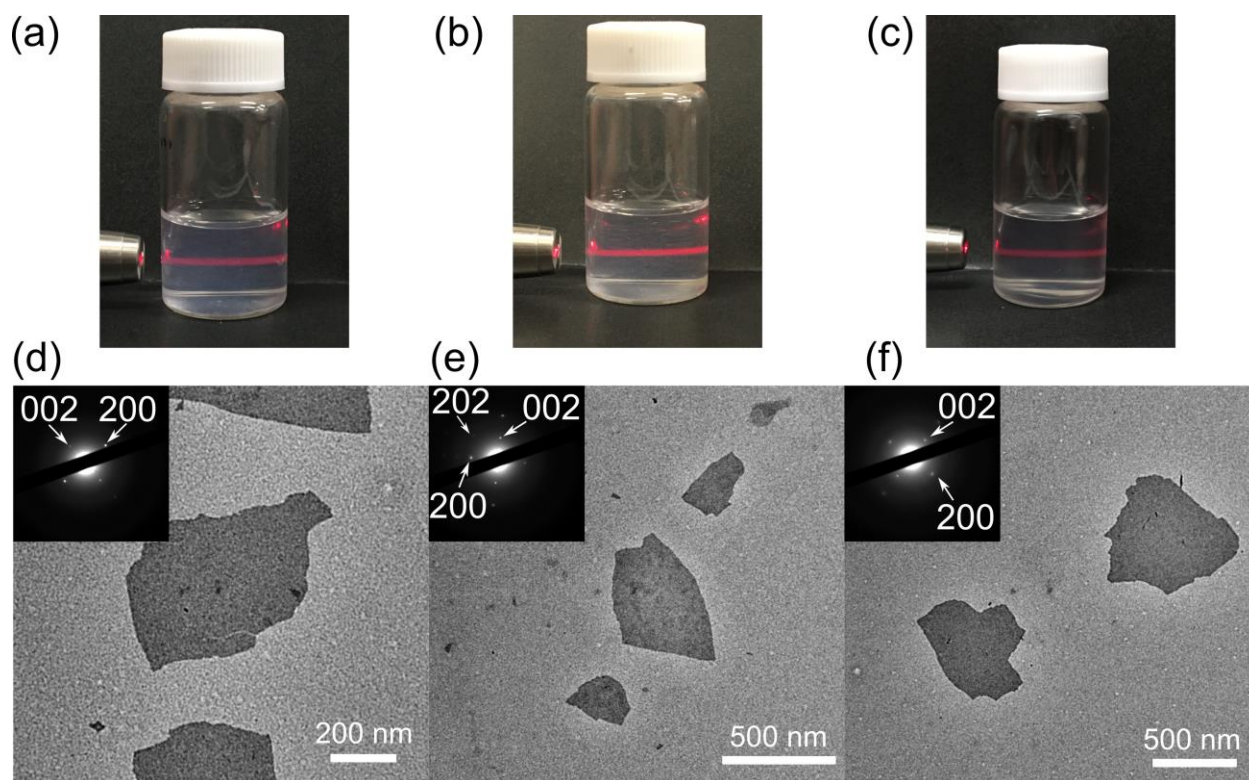

**Fig. S6** Photographs of colloidal dispersions with Tyndall scattering of (a) PNB@pH4\_NbO, (b) TBA\_PNB\_NbO and (c) TBA\_PNB@pH4\_NbO, and TEM images and electron diffraction patterns of (d) PNB@pH4\_NbO, (e) TBA\_PNB\_NbO and (f) TBA\_PNB@pH4\_NbO.

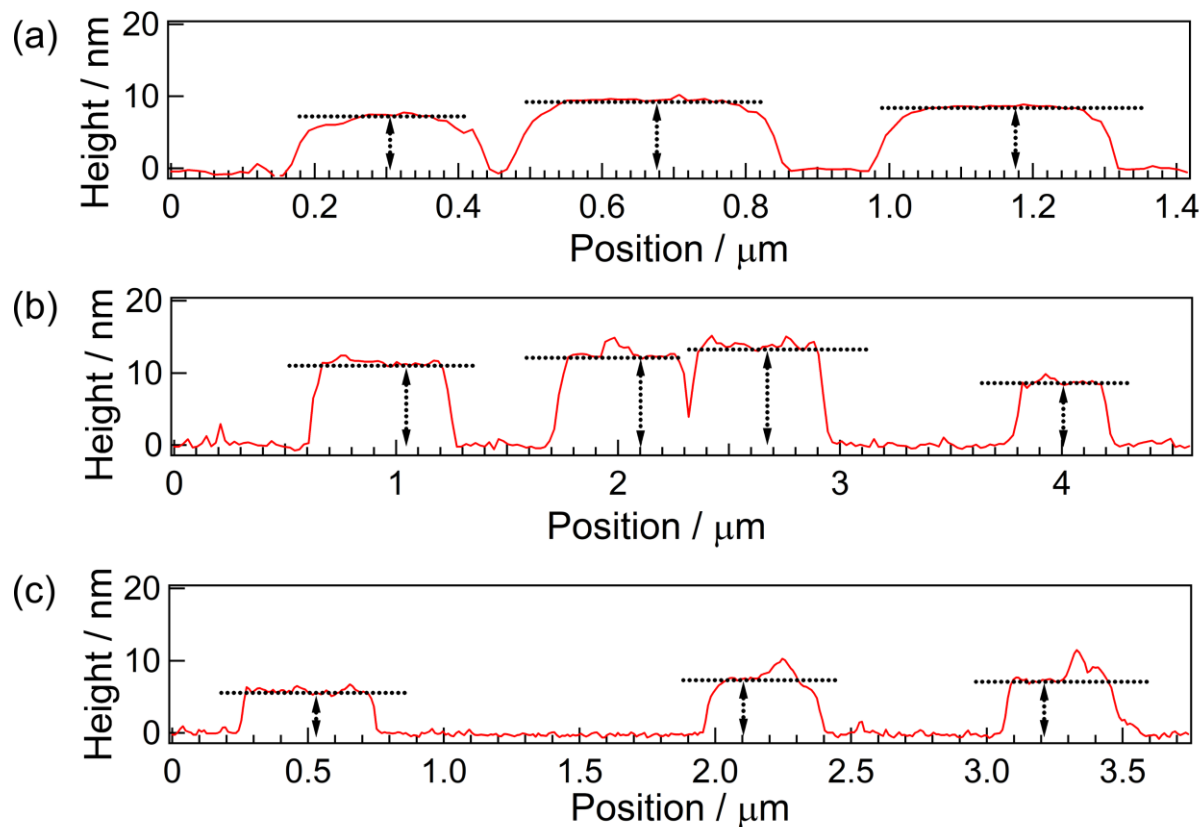

**Fig. S7** The enlarged cross-section profiles of (a) PNB@pH4\_NbO, (b) TBA\_PNB\_NbO and (c) TBA\_PNB@pH4\_NbO in Fig. 7 (a), Fig. 8 (a) and (c), respectively.
